# Supplementary material
Source: publisher figshare collection journal article supplement (https://acs.figshare.com/ndownloader/files/15330818)
Supplement: Supplementary file 1 [file 15330818]

# A bio-based epoxy resin by electrochemical modification of tall oil fatty acids

Goswinus H. M. de Kruijff,<sup>†,‡</sup> Thorsten Goshler,<sup>⊥</sup> Lukasz Derwich,<sup>§</sup> Nicole Beiser,<sup>†</sup> Oliver M. Türk,<sup>⊥,§</sup> and Siegfried R. Waldvogel<sup>\*,†,‡</sup>

<sup>†</sup> Institute of Organic Chemistry, Johannes Gutenberg University Mainz, 55128 Mainz, Germany.

<sup>‡</sup> Graduate School Material Science in Mainz, Johannes Gutenberg University Mainz, 55128 Mainz, Germany.

<sup>⊥</sup> Technische Hochschule Bingen, Berlinstr. 109, 55411 Bingen am Rhein, Germany.

<sup>§</sup> Transferstelle Bingen TSB, Berlinstr. 107a, 55411 Bingen am Rhein, Germany.

\* Corresponding Author E-mail: waldvogel@uni-mainz.de

## Electronic Supplementary Material

11 pages, 9 figures, 2 tables

### Content

|                                          |    |
|------------------------------------------|----|
| Electrolysis cells .....                 | 2  |
| Electrochemical Parameter Screening..... | 3  |
| NMR Characterization .....               | 5  |
| FT-IR Characterization .....             | 6  |
| Carbon balance .....                     | 7  |
| Energy considerations.....               | 8  |
| Mechanical Analysis .....                | 9  |
| References.....                          | 11 |

## Electrolysis cells

**Beaker-type cell (25 mL or 200 mL).** The beaker-type cell (25 mL or 200 mL) consists of a simple glass beaker with or without cooling jacket and closed by a Teflon plug. This cap allows precise arrangement of the electrodes in a distance of 10 mm. Dimensions of used electrodes were 7.0 cm x 2.0 cm x 0.2 cm. The electrodes had upon immersion into the electrolyte an active surface of 8 cm<sup>2</sup> for the 25 mL cell and 6 cm<sup>2</sup> for the 200 mL cell. A four-channel HMP4040 (Rohde&Schwarz GmbH & Co. KG, Munich, Germany) or single-channel Z60-3.5 (TDK Lambda, Achern, Germany) was used as power supply. For the electrochemical reaction, isostatic graphite (SIGRAFINE® V2100, SGL Carbon, Bonn-Bad Godesberg, Germany) was used as electrode material. Terminal voltage in both beaker-type cells following General Protocol A typically is in the range of 4-6 V and following General Protocol B of 7-13 V.

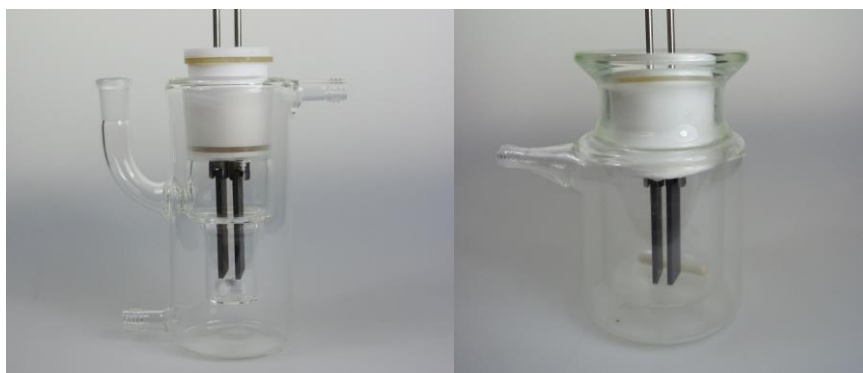

**Figure S1:** Double-jacketed beaker-type cell; left: 25 mL; right: 200 mL.

**Beaker-type cell (1.5 L).** The undivided 1.5 L vessel is equipped with a heating jacket, bottom outlet and thermometer. A stacked electrode setup of 6 isostatic graphite electrodes (d = 5 mm) with alternating connectivity to power supply was used with a total surface area of 374 cm<sup>2</sup> anodic and cathodic sites. For power supply, a TDK Lambda Genesys™ GEN 30-50 was used providing a maximum of 1500 W at 30 V/50A. The electrolysis was performed exclusively in well-ventilated fume hoods to prevent the formation of an explosive hydrogen air mixture.

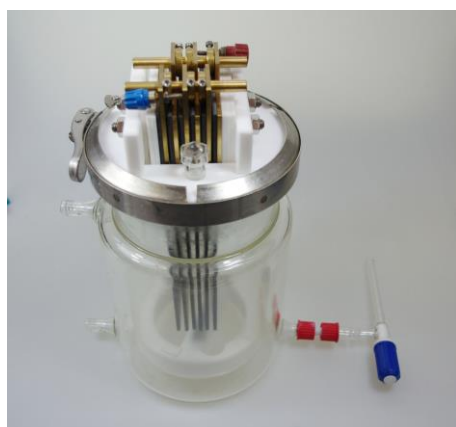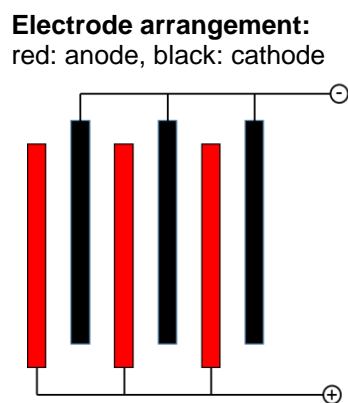

**Figure S2:** Double-jacketed 1500 mL beaker-type cell; left: assembled; right: technical illustration of the electrode arrangement.

## Electrochemical Parameter Screening

### Screening of charge equivalents for the anodic decarboxylation of TOFA

#### (General Protocol A)

Tall oil fatty acid (TOFA, 5 mmol) and sodium methoxide (5 mmol) were transferred into an undivided double-jacketed 25 mL beaker-type electrolysis cell equipped with an isostatic graphite anode and an isostatic graphite cathode. Methanol was added until a volume of 20 mL was reached (0.25 M). A constant current electrolysis with a current density of 20 mA/cm<sup>2</sup> was performed at 50°C. After completion, the reaction solution was concentrated under reduced pressure, taken up in water (50 mL) and set to pH 3 by adding aqueous HCl (10%). The aqueous phase was afterwards extracted twice with 50 mL of ethyl acetate. The combined organic phases were washed with brine and dried over MgSO<sub>4</sub> and filtered. Evaporation of the solvent gave electrolyzed TOFA as a pale yellow oil.

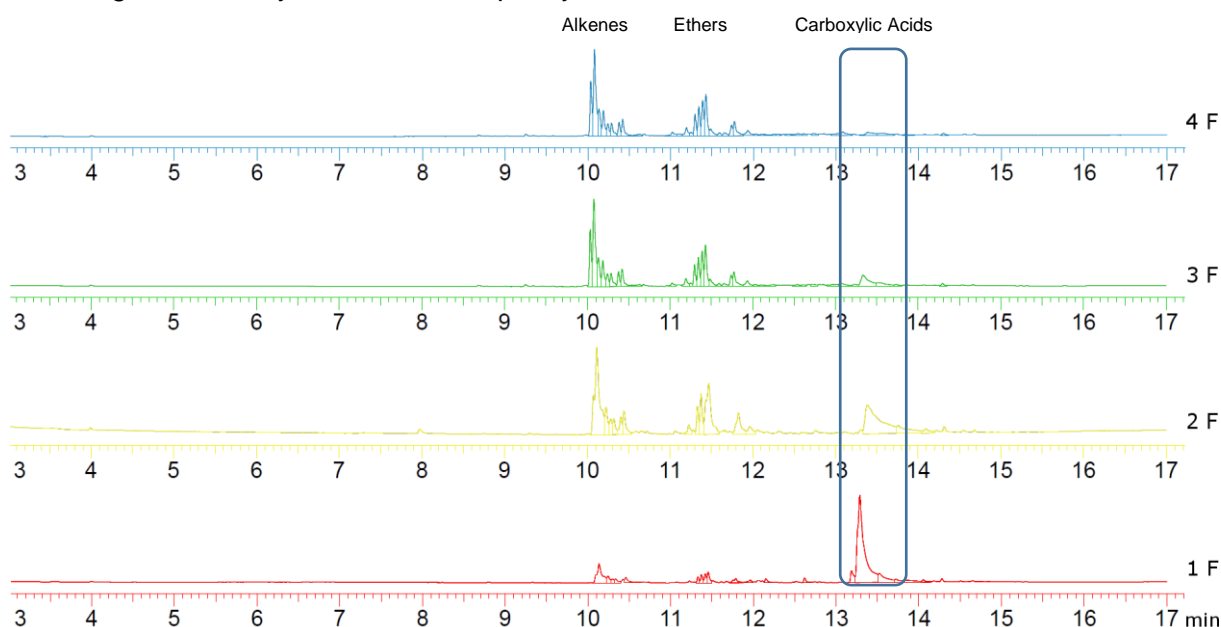

**Figure S3:** Influence of charge equivalents on TOFA electrolysis (GC chromatograms of crude product mixture).

In this setup, the starting material was completely consumed after slightly more than 3 F had passed. At a constant charge of 3 F, the conversion decreased with decreasing concentration of TOFA (see below).

## Screening of carboxylic acid concentration for the anodic decarboxylation of TOFA (General Protocol B)

Tall oil fatty acid (TOFA) and sodium methoxide (1 eq.) were dissolved in methanol (200 mL) and transferred into an undivided double-jacketed 200 mL beaker-type electrolysis cell equipped with an isostatic graphite anode and an isostatic graphite cathode. A constant current electrolysis with a current density of 20 mA/cm<sup>2</sup> was performed at 50°C. After a charge of 3 F had passed, the reaction solution was concentrated under reduced pressure, taken up in water (100 mL) and set to pH 3 by adding aqueous HCl (10%). The aqueous phase was afterwards extracted twice with 100 mL of ethyl acetate. The combined organic phases were washed with brine and dried over MgSO<sub>4</sub> and filtered. Evaporation of the solvent gave electrolyzed TOFA as a pale yellow oil.

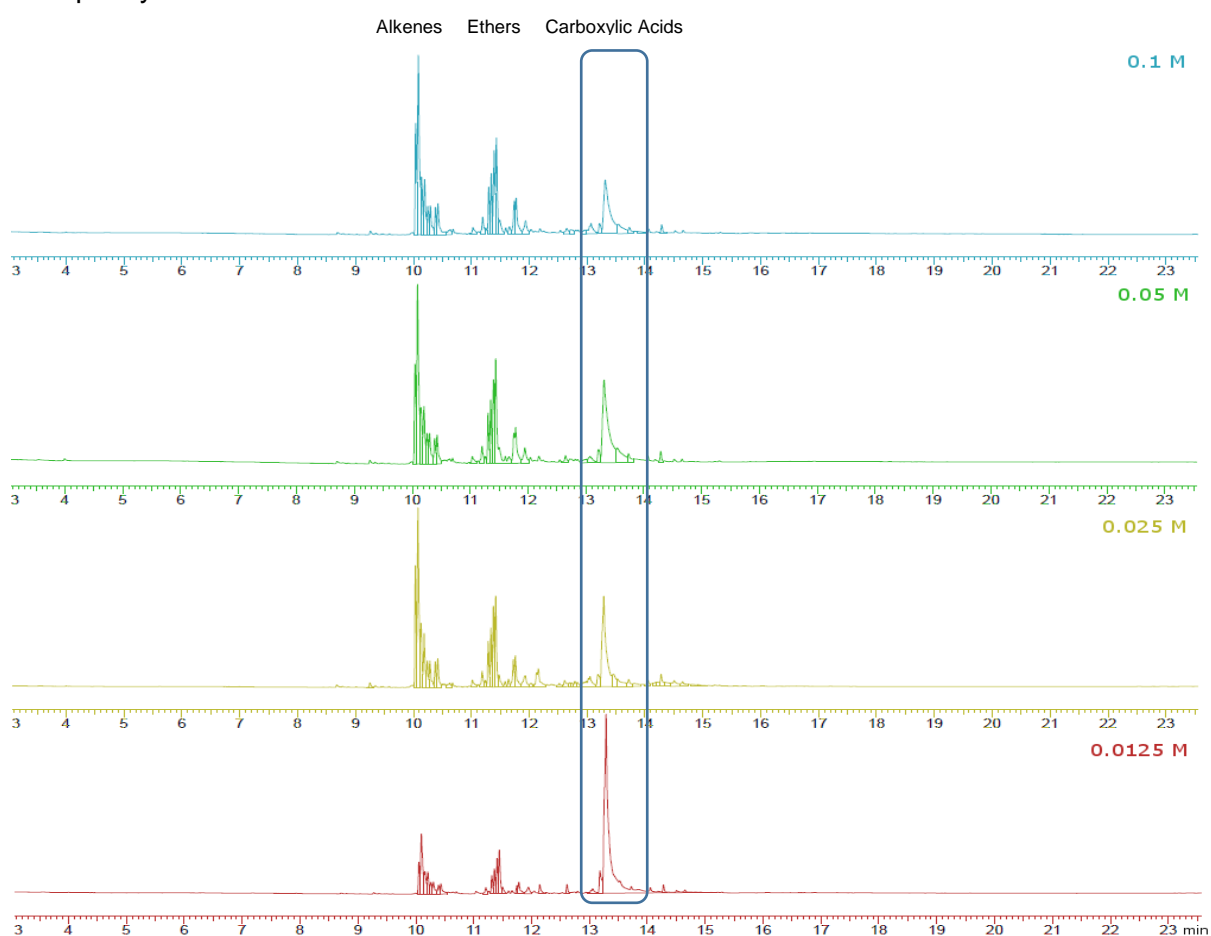

**Figure S4:** Influence of concentration on TOFA electrolysis (GC chromatograms of crude product mixture).

## NMR Characterization

The conversion of olefinic bonds by epoxidation was confirmed by NMR spectroscopy. The olefinic signals at 5-6 ppm ( $^1\text{H}$ , blue) and 110-140 ppm ( $^{13}\text{C}$ , blue) of EL-TOFA are completely gone in ELPOXY-TOFA (black). A

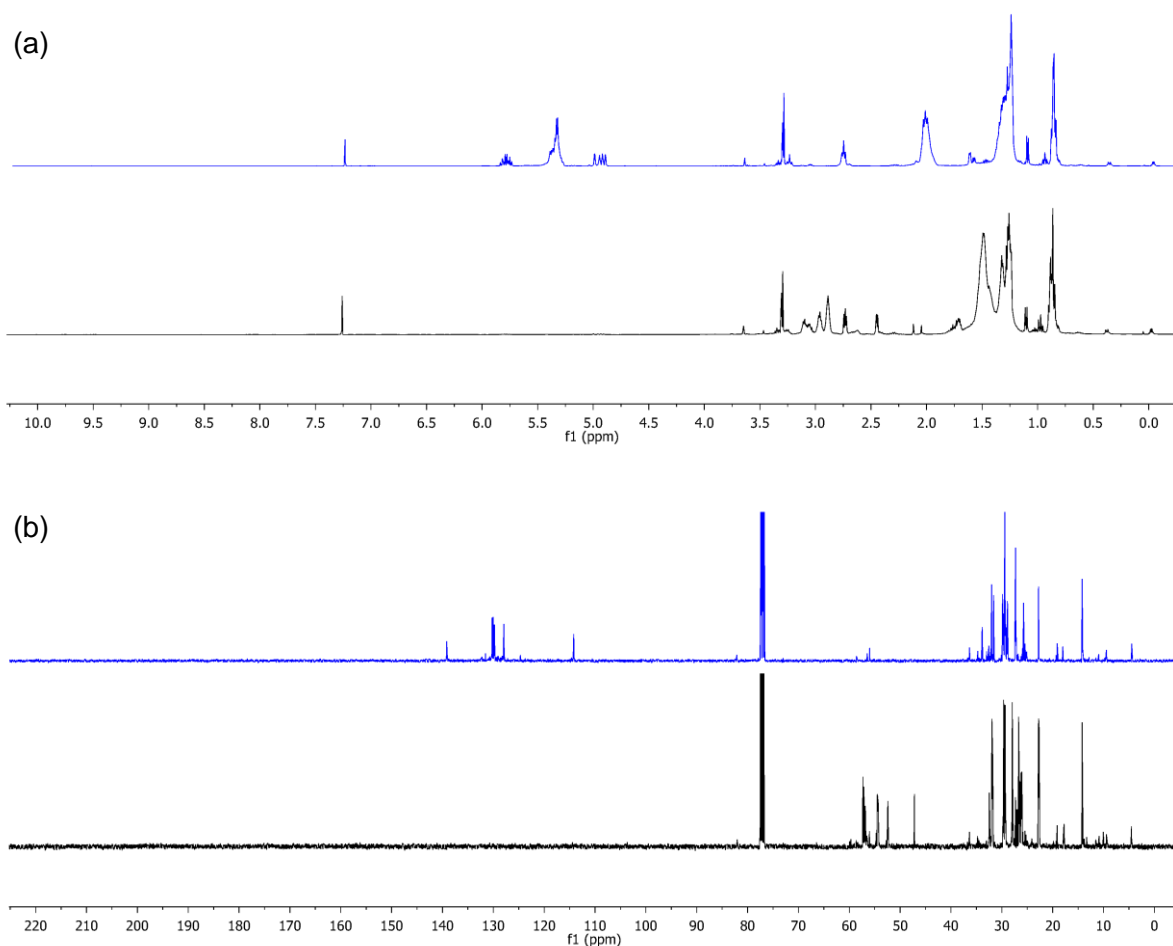

**Figure S5:**  $^1\text{H}$  (a) and  $^{13}\text{C}$  (b) spectra of EL-TOFA (blue) after electrolysis and ELPOXY-TOFA (black) subsequent epoxidation process.

## FT-IR Characterization

The FT-IR spectra of the starting material TOFA, the resin precursor ELTOFA and the epoxy resin ELPOXY-TOFA are shown in Fig. S6. The characteristic carbonyl absorption at  $1706\text{ cm}^{-1}$  disappears after decarboxylative electrolysis. Likewise, the alkene C-H stretch band at  $3009\text{ cm}^{-1}$  is not observed in the ELPOXY-TOFA resin, indicating the conversion of olefinic bonds to oxiranes. The absorption peak at  $1093\text{ cm}^{-1}$  is assigned to the C-O-C ether stretch in both methyl ether electrolysis by-product and oxirane. The sharp peak at  $908\text{ cm}^{-1}$  for ELTOFA represents the out-of-plane monosubstituted alkene bend from terminal alkenes formed during electrolysis, which replaced by the broader absorption peak at  $912\text{ cm}^{-1}$  representing the C-O deformation of oxiranes after epoxidation to ELPOXY-TOFA. This is accompanied by the C-O-C stretch absorption peaks at  $1261$  and  $824\text{ cm}^{-1}$ .

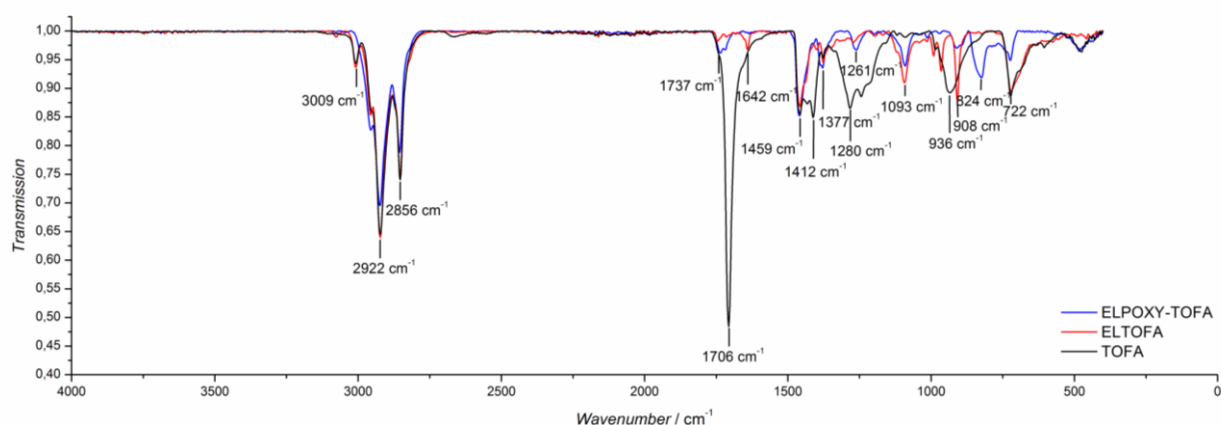

**Figure S6:** IR spectra of TOFA (black), EL-TOFA (red) and ELPOXY-TOFA (blue).

## Carbon balance

On the basis of the obtained experimental data, a carbon balance calculation was performed (Table S1). After electrolysis, 5.6% carbon is released as CO<sub>2</sub> (inherent to the Kolbe decarboxylation). The largest proportion of 81.2% carbon ends up in the ELPOXY Olefin/Ether product, while a minor share of 13.2% carbon is lost as by-product and removed by distillation. After epoxidation, 99% of the theoretical mass is recovered. Therefore, the bio-based carbon content of 98% is retained during epoxidation from EL-TOFA to ELPOXY-TOFA.

**Table S1:** Carbon balance calculation for the preparation of ELPOXY-TOFA.

| Starting material    | mass   | amount of substance | carbon content | biobased carbon share | Experimental Data |                      |
|----------------------|--------|---------------------|----------------|-----------------------|-------------------|----------------------|
| TOFA                 | 91,3 g | 0,325 mol           | 70,2 g         | 100,0 %               | Olefins           | 48 % M = 235 g / mol |
|                      |        |                     |                |                       | Ether             | 38 % M = 267 g / mol |
|                      |        |                     |                |                       | By-Products       | 14 %                 |
| Electrolysis         | mass   | amount of substance | carbon content | biobased carbon share |                   |                      |
| CO <sub>2</sub> loss | 14,3 g | 0,325 mol           | 3,9 g          | 5,6 %                 |                   |                      |
| Ether                | 33,0 g | 0,124 mol           | 26,7 g         | 35,9 %                |                   |                      |
| OMe incorporation    | 3,8 g  | 0,124 mol           | -1,5 g         | 0,0 %                 |                   |                      |
| Olefins              | 36,7 g | 0,156 mol           | 31,8 g         | 45,3 %                |                   |                      |
| By-Products          |        |                     | 9,3 g          | 13,2 %                |                   |                      |
| <b>Sum</b>           |        |                     | <b>70,2 g</b>  | <b>100,0 %</b>        |                   |                      |

Olefin/Ether 1:0.8

| Starting material | mass   | amount of substance | carbon content | biobased carbon share | Experimental Data           |                      |
|-------------------|--------|---------------------|----------------|-----------------------|-----------------------------|----------------------|
| EL-TOFA           | 20,0 g | 0,082 mol           | 17,1 g         | 98,4 %                | Olefins                     | 72 % M = 235 g / mol |
|                   |        |                     |                |                       | Ether                       | 28 % M = 267 g / mol |
|                   |        |                     |                |                       | I <sub>2</sub> number       | 217 g                |
|                   |        |                     |                |                       | C=C (I <sub>2</sub> number) | 0,171 mol            |

## Energy considerations

The operating voltage of the 1.5 L electrolysis cell is 5 V at 7.48 A (37.4 W). 91.3 g (3.25 mol) TOFA were electrolyzed for 3.5 h (until a charge of 3 F had passed). This equals an energy input of 0.131 kWh. Based on 35.5 g obtained EL-TOFA that was used in the subsequent epoxidation, this corresponds to a current efficiency of 32% and an energy input of 13.3 kJ/g (3.69 Wh/g).

Average industrial electricity prices in 2017 were 68.8 \$US/MWh (US) and 115.8 \$US/MWh (EU). This corresponds to 0.92 ¢US/mol (US) and 1.6 ¢US/mol (EU) electrons used as oxidizing agent operating at 5 V, by far outcompeting classical oxidizing agents such as H<sub>2</sub>O<sub>2</sub> (Table S2).

**Table S2:** Oxidizing agent costs for common laboratory oxidizers per mole.

|                 | Oxidizing agent                  | Price [\$US/mol] |
|-----------------|----------------------------------|------------------|
| 1 <sup>a</sup>  | Electricity @5V (Industrial, US) | 0.009            |
| 2 <sup>a</sup>  | Electricity @5V (Industrial, EU) | 0.016            |
| 3 <sup>b</sup>  | Electricity @5V (Household, US)  | 0.017            |
| 4 <sup>b</sup>  | Electricity @5V (Household, EU)  | 0.030            |
| 5 <sup>c</sup>  | Hydrogen peroxide (aq., 30%)     | 13.60            |
| 6 <sup>d</sup>  | Oxygen, 2.5 (99.5%)              | 13.86            |
| 7 <sup>d</sup>  | Oxygen, 4.5 (99.995%)            | 101.31           |
| 8 <sup>c</sup>  | Iodine                           | 110.00           |
| 9 <sup>c</sup>  | Oxone                            | 7.82             |
| 10 <sup>c</sup> | <i>t</i> BuOOH                   | 361.93           |
| 11 <sup>c</sup> | Iron trichloride                 | 8.81             |
| 12 <sup>c</sup> | Potassium peroxodisulfate        | 21.63            |
| 13 <sup>c</sup> | Potassium hexacyanoferrate(III)  | 52.25            |

€EUR-\$US exchange rate: 1,124 (wallstreet-online.de, 24.04.2019), a) from "Electric power annual", released by the US Department of Energy on October 22, 2018, b) from "Energy prices and costs in Europe", SWD, released by the European Commission in January 2019, c) Prices from Sigma Aldrich, Germany, 24.04.2019, d) Westfalen AG.



## Mechanical Analysis

Curing of ELPOXY-TOFA resin was monitored in a continuous DMA measurement using a DMA 242 E Artemis (Netzsch, Germany) equipped with a sample holder and a ball-shaped pushrod. In this setup, the change in viscoelastic properties during the curing reaction is evaluated as a function of compression force.

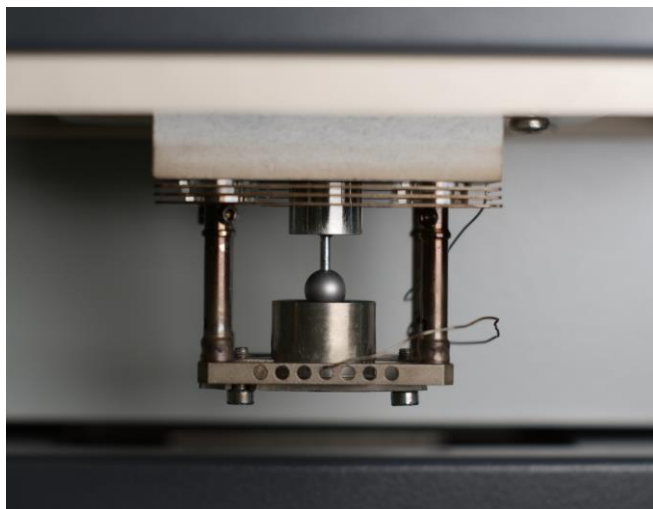

**Figure S7:** DMA setup for evaluation of viscoelastic properties.

Isothermal curing at 100 °C of ELPOXY-TOFA with MTHPA in stoichiometric ratio of epoxy/anhydride 1:1 in presence of 3 wt% imidazol in 1,3-butanediol (1:2) was performed in the DMA setup described above (Fig. S8). After 2400 min, the compression force stayed constant. Consequently, no further cross-linking of the epoxy material took place.

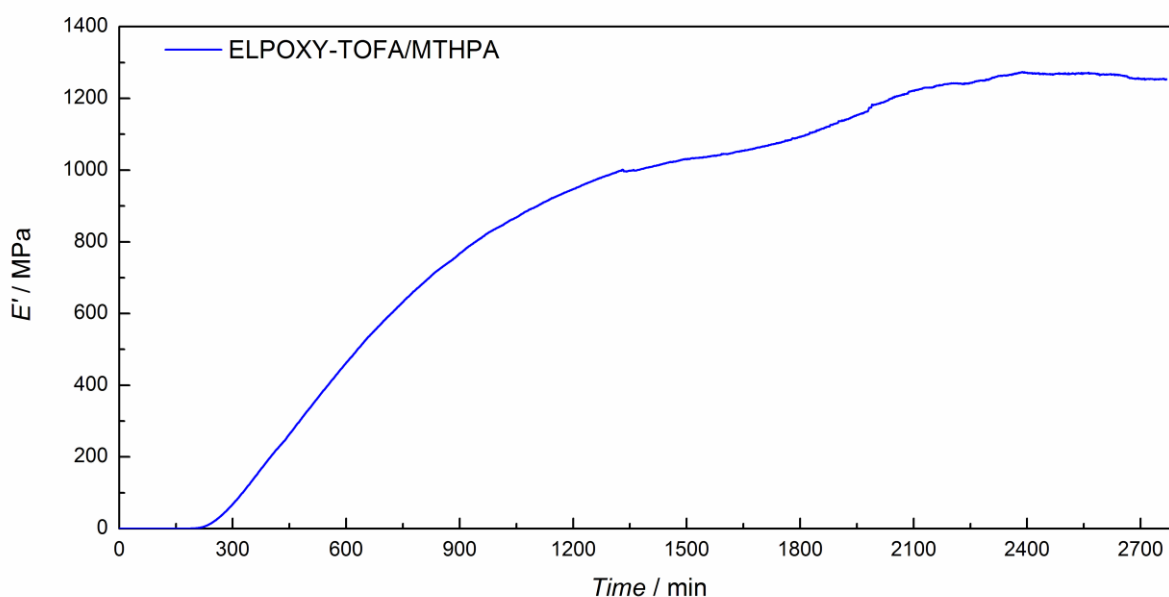

**Figure S8:** Compression DMA for isothermal curing of ELPOXY-TOFA/MTHPA at 100°C.

The curing of the epoxy resin was performed using the anhydride hardener (MTHPA, MNA, DDSA) in stoichiometric ratio of epoxy/anhydride 1:1 in presence of 3 wt% imidazol in 1,3-butanediol (1:2). The samples were homogenized by thorough mixing before analysis and curing. For the preparation of test specimen, the epoxy-anhydride mixture was poured into a silicon mold. The dimensions of the resulting specimen were 60 mm x 10 mm x 3.2 mm for DMA testing, standardized dog-bone shaped specimen (type 1A) for tensile testing according DIN EN ISO 527-2<sup>[1]</sup> and standardized rectangular 80 mm x 10 mm x 4 mm specimen for determination of flexural properties according DIN EN ISO 178<sup>[2]</sup> and impact properties according DIN EN ISO 179<sup>[3]</sup> for determination of impact properties. Curing was performed in an oven at 100 °C for 24 h. After cooling to room temperature, the specimen were kept at 100 and 120 °C for one hour each and additional 2 hours at 140 °C.

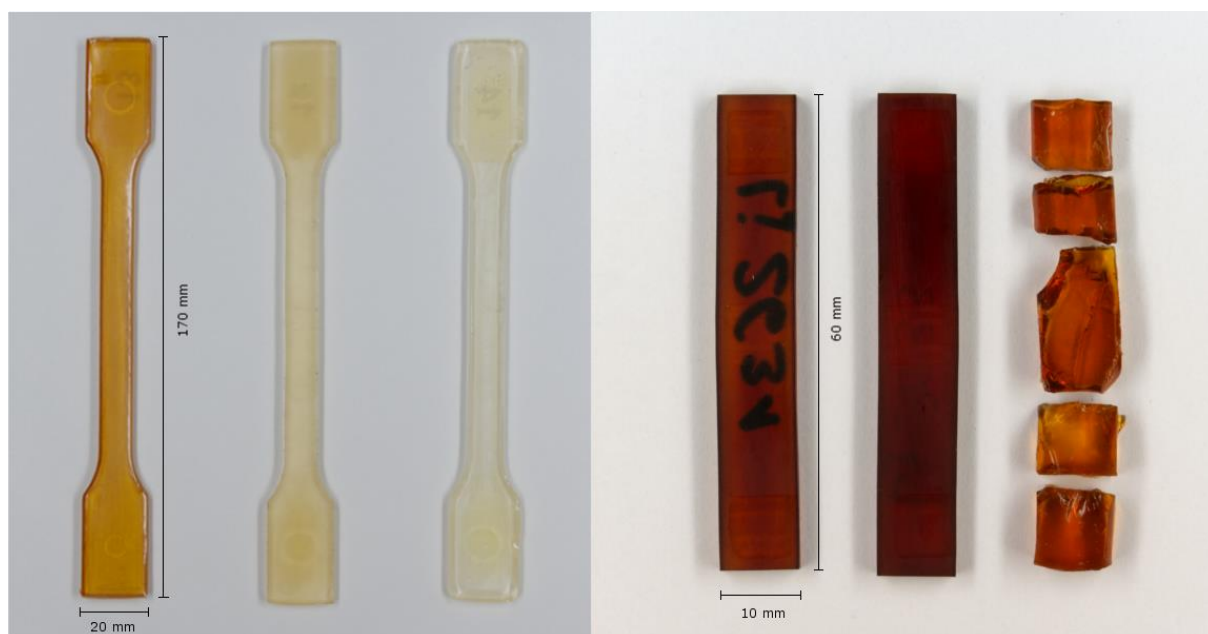

**Figure S9:** Test specimen, left: dog-bone shaped for tensile testing (ELPOXY-TOFA, PTP cured with MTHPA), right: bar-shaped DMA specimen of ELPOXY-TOFA cured with MTHPA, MNA and DDSA, respectively (deformed after recovery from DMA measurement sample holder).

## References

- [1] DIN EN ISO 527-2:2012-02, *Plastics - Determination of tensile properties - Part 2: Test conditions for moulding and extrusion plastics*, **2012**, Standard, Beuth Verlag GmbH, Berlin.
- [2] DIN EN ISO 178:2013-09, *Plastics - Determination of flexural properties*, **2013**, Standard, Beuth Verlag GmbH, Berlin.
- [3] DIN EN ISO 179-1:2010-11, *Plastics - Determination of Charpy impact properties - Part 1: Non-instrumented impact test*, **2010**, Standard, Beuth Verlag GmbH, Berlin.
